# Supplementary material
Source: PubMed Central journal article supplement (PMC4679720)
Supplement: NIHMS688930-supplement-2.pdf [file NIHMS688930-supplement-2.pdf]

**Table S1. Patient characteristics. AE = t(8:21) and INV = inv(16)**

| Patient Code | Sex/Age | Karyotype                                                                                                                  |                                                                                                                                                                                                                     | Time to relapse (months) | % blasts in D/R (Pre-Ficoll) | Germline DNA source <sup>a</sup> |
|--------------|---------|----------------------------------------------------------------------------------------------------------------------------|---------------------------------------------------------------------------------------------------------------------------------------------------------------------------------------------------------------------|--------------------------|------------------------------|----------------------------------|
|              |         | At diagnosis                                                                                                               | At relapse                                                                                                                                                                                                          |                          |                              |                                  |
| AET1*        | F/36    | 46,XX,t(8;21)(q22;q22)[20]                                                                                                 | 45,X,-X,t(8;21)(q22;q22),del(15)(q13q15)[15]/46,X,-X,t(8;21)(q22;q22),+15,del(15)(q13q15)[3]/46,XX[2]                                                                                                               | 6.4                      | 36/35                        | BS@D                             |
| AET2         | F/38    | 46,XX,t(8;21)(q22;q22)[2]/45,X,-X,t(8;21)(q22;q22)[15]/46,XX[3]                                                            | 45,X,-X,t(1;17)(q42;p13),t(8;21)(q22;q22)[15]/45,X,-X,t(6;12)(p21;p13),t(8;21)(q22;q22)[5]                                                                                                                          | 6.9                      | 58/64                        | PB@CR                            |
| AET3         | M/52    | 45,X,-Y,t(8;21)(q22;q22)[20]                                                                                               | 88<4N>,XX,-Y,add(1)(p36),del(1)(p34),-4,add(4)(q33),-5,+8,t(8;21)(q22;q22)x2,-11,add(17)(p11.2)[14]/44,X,-Y,der(1)t(1;10)(p13;q11.2),der(5)ins(5;1)(q35;p36.3p31),t(7;11)(p15;q23),t(8;21)(q22;q22)[5] <sup>b</sup> | 5.5                      | 68/80                        | PB@CR                            |
| AET4         | M/52    | 46,XY,t(8;21)(q22;q22)[19]/46,XY[1]                                                                                        | 46,XY,del(1)(q25q32),add(2)(q24),t(8;21)(q22;q22)[19]/46,XY[1]                                                                                                                                                      | 7.8                      | 34/71                        | PB@CR                            |
| AET5         | F/22    | 46,XX,t(8;21)(q22;q22)[20]                                                                                                 | 46,XX,t(8;21)(q22;q22)[19]/46,XY[1]                                                                                                                                                                                 | 8.8                      | 53/95                        | BM@CR                            |
| AET7         | M/23    | 46,XY,t(8;21)(q22;q22)[20]                                                                                                 | 46,XY,t(3;12)(q21;q24.1),t(8;21)(q22;q22)[19]/46,XY[1]                                                                                                                                                              | 9.2                      | 56/65                        | PB@CR                            |
| INVT1*       | M/51    | 46,XY,inv(16)(p13q22)[20]                                                                                                  | 46,XY,inv(16)(p13q22)[14]/46,XY[6]                                                                                                                                                                                  | 6.4                      | 53/77                        | BS@D                             |
| INVT2        | M/52    | 46,XY,inv(16)(p13q22)[3]/46,XY,del(7)(q22q34),inv(16)(p13q22)[8]/47,XY,inv(16)(p13q22),add(18)(p11),+22[9]                 | 46,XY,del(7)(q22q34),inv(16)(p13q22)[15]/46,XY[7]                                                                                                                                                                   | 6.8                      | 71/24                        | BM@CR                            |
| INVT3        | M/19    | 46,XY,inv(16)(p13q22)[8]/47,idem,+8[6]/48,idem,+4,+8[3]/48,idem,+2mar[2]/46,XY[1]                                          | 49,XY,del(3)(q13.2q25),+8,t(12;15)(q24.3;q15),inv(16)(p13.1q22),+2mar[18]/46,XY[1]*                                                                                                                                 | 7.9                      | 23/73                        | PB@CR                            |
| INVT4        | M/37    | 47,XY,+8,inv(16)(p13q22)[19]/46,XY[1]                                                                                      | 47,XY,+8,inv(16)(p13.1q22)[5]/46,XY[15]                                                                                                                                                                             | 10.6                     | 67/40                        | PB@CR                            |
| INVT5        | M/29    | 51,XY,+14,+15,t(16;16)(p13.1;q22),+20,+21,+22[6]/47,XY,t(3;11)(p13;q2?3),t(16;16)(p13.1;q22),+22[2]/46,XY[11] <sup>b</sup> | 46,XY,t(3;11)(p13;q2?3),t(16;16)(p13.1;q22),+22[12]/46,XY,del(3)(q21q21),inv(4)(p13q13),t(7;11)(p15;p12),t(16;16)(p13.1;q22)[2]/46,XY[6]                                                                            | 8.2                      | 52/20                        | PB@CR                            |
| INVT6*       | M/47    | 46,XY,inv(16)(p13q22)[20]                                                                                                  | 46,XY,inv(16)(p13q22)[29] <sup>b</sup>                                                                                                                                                                              | 13.9                     | 59/78                        | BS@rx                            |
| INVT7        | F/26    | 46,XX,inv(16)(p13.1q22)[16]/46,XX[4]                                                                                       | 46,XX,inv(16)(p13.1q22)[17]/46,XX,inv(16)(p13.1q22),add(16)(q24)[3]                                                                                                                                                 | 5.7                      | 68/88                        | PB@CR                            |

<sup>a</sup>: BS@D: buccal smear at diagnosis, BS@rx: buccal smear during treatment, PB@CR: peripheral blood during remission, BM@CR: bone marrow during remission

<sup>\*</sup>: Paired tumor DNAs from diagnosis and relapse were used in WES and SNP arrays

<sup>b</sup>: One additional cell with nonclonal abnormalities was also detected.
