# Supplementary material
Source: PubMed Central journal article supplement (PMC4679720)
Supplement: NIHMS688930-supplement-6.pdf [file NIHMS688930-supplement-6.pdf]

**Table S5. Sequence of Primers used for manual validation of somatic SNVs**

| Primer Name | Primer Sequence with M13 adapter sequence added | Amplicon Size (bp)* |
|-------------|-------------------------------------------------|---------------------|
| AHNAK-F1    | TGTA AACGACGGCCAGTTCAGGAGTGTCAATGCCAC           | 337                 |
| AHNAK-R1    | CAGGAAACAGCTATGACCTGCACCTGAAAGGTCCAAG           |                     |
| AHNAK-F2    | TGTA AACGACGGCCAGTTCAGCTTGATGTCTCAGGAC          | 218                 |
| AHNAK-R2    | CAGGAAACAGCTATGACCAGAGACACATCCATGTCACC          |                     |
| AHNAK-F3    | TGTA AACGACGGCCAGTTCAGATGCTGAGATGAAC            | 392                 |
| AHNAK-R3    | CAGGAAACAGCTATGACCACCTTCGATACTGACATCAG          |                     |
| FLT3-F1     | TGTA AACGACGGCCAGTACATTCCACACTACAGCGAC          | 411                 |
| FLT3--R1    | CAGGAAACAGCTATGACCAGCTGTTTCATGTGAACCATGG        |                     |
| FLT3-F2     | TGTA AACGACGGCCAGTTCCTATTCTAACTGACTC            | 433                 |
| FLT3--R2    | CAGGAAACAGCTATGACCTCTTTGTGTCTCCTCCAC            |                     |
| HAUS6-F1    | TGTA AACGACGGCCAGTACTCCAGCCAGCTATGATCG          | 381                 |
| HAUS6-R1    | CAGGAAACAGCTATGACCTCCTTCCACTTCTCTACAAC          |                     |
| HAUS6-F2    | TGTA AACGACGGCCAGTTCATCTATGTGACTGGTCAGC         | 365                 |
| HAUS6-R2    | CAGGAAACAGCTATGACCTGATTCATTGCATGCTCTATG         |                     |
| HYOU1-F1    | TGTA AACGACGGCCAGTTCAGGACTCCCATCCTACAC          | 299                 |
| HYOU1-R1    | CAGGAAACAGCTATGACCTCTAGTGTGCAACAGTGTG           |                     |
| KIT-F1      | TGTA AACGACGGCCAGTACTCAGCAGCCTCAGGAAG           | 316                 |
| KIT-R1      | CAGGAAACAGCTATGACCTCAAGTGAATTGCAGTCTTC          |                     |
| KIT-F2      | TGTA AACGACGGCCAGTTCCTCCAACCTAATAGTG            | 291                 |
| KIT-R2      | CAGGAAACAGCTATGACCTGTGTGATATCCCTAGACAGG         |                     |
| MYH7B-F1    | TGTA AACGACGGCCAGTTCATGTATGTGCTGGGCAC           | 314                 |
| MYH7B-R1    | CAGGAAACAGCTATGACCAGTGTGCACCTTCGTCATC           |                     |
| MYH7B-F2    | TGTA AACGACGGCCAGTAGAATAGCCGGTAAGCACTG          | 250                 |
| MYH7B-R2    | CAGGAAACAGCTATGACCTGCTGCCGATTCCACCACAG          |                     |
| NRAS-F2     | TGTA AACGACGGCCAGTACACCCCAAGATTCTTACAG          | 308                 |
| NRAS-R2     | CAGGAAACAGCTATGACCTTCCCTAGTGTGGTAACCTC          |                     |
| SYNPO2-F1   | TGTA AACGACGGCCAGT AGTGATCCTCGACTGCTCTG         | 266                 |
| SYNPO2-R1   | CAGGAAACAGCTATGACC AGGCAGA ACTTACGTGCATG        |                     |
| SYNPO2-F2   | TGTA AACGACGGCCAGTACTGGAGCTGGAGGTGATTCC         | 289                 |
| SYNPO2-R2   | CAGGAAACAGCTATGACCTGATGGAGGAGACAACGGTG          |                     |
| TRIM42-F1   | TGTA AACGACGGCCAGTACTGCATGCCCTACAGCAAC          | 328                 |
| TRIM42-R1   | CAGGAAACAGCTATGACCTGGATGCAGATCTTCTCGTC          |                     |
| TRIM42-F2   | TGTA AACGACGGCCAGTTCAGTCCATCCATGAGCTC           | 331                 |
| TRIM42-R2   | CAGGAAACAGCTATGACCTGTCTGCTCCAGCACTCCAG          |                     |

\*: amplicon size includes 36 bp added by the adapters.
